# Supplementary material
Source: Springer Nature journal article supplement (https://www.springermedizin.de/resource/supplementary/12969_2008_361_MOESM1_ESM.pdf/9592916)

A

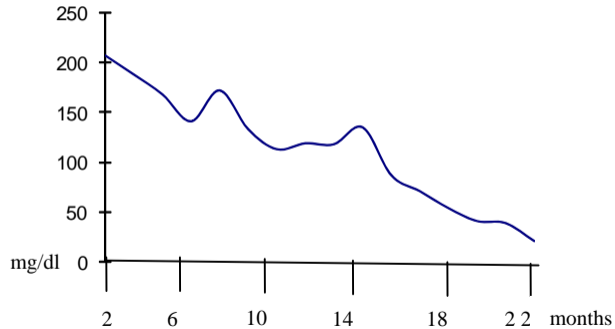

B

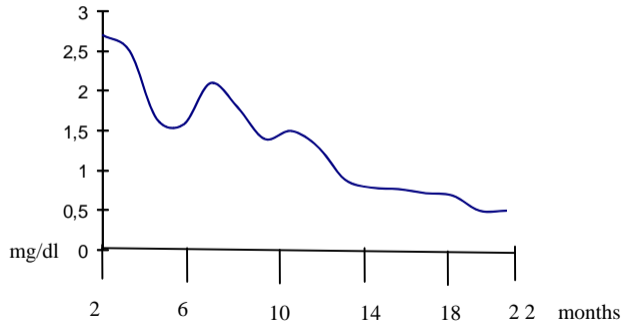

Supplement: MOESM1 [file 9592916]
